# Supplementary material for: Cyclodextrin-Based Nanosponges as Perse Antimicrobial Agents Increase the Activity of Natural Antimicrobial Peptide Nisin
Source: MDPI journal article supplement (doi:10.3390/pharmaceutics14030685), 2022-03-21
Supplement: s1 [file s1]

# Supplementary Materials: Cyclodextrin-Based Nanosponges as Perse Antimicrobial Agents Increase the Activity of Natural Antimicrobial Peptide Nisin

Yousef Khazaei Monfared, Mohammad Mahmoudian, Gjyljje Hoti, Fabrizio Caldera, José Manuel López Nicolás, Parvin Zakeri-Milani, Adrián Matencio, and Francesco Trotta

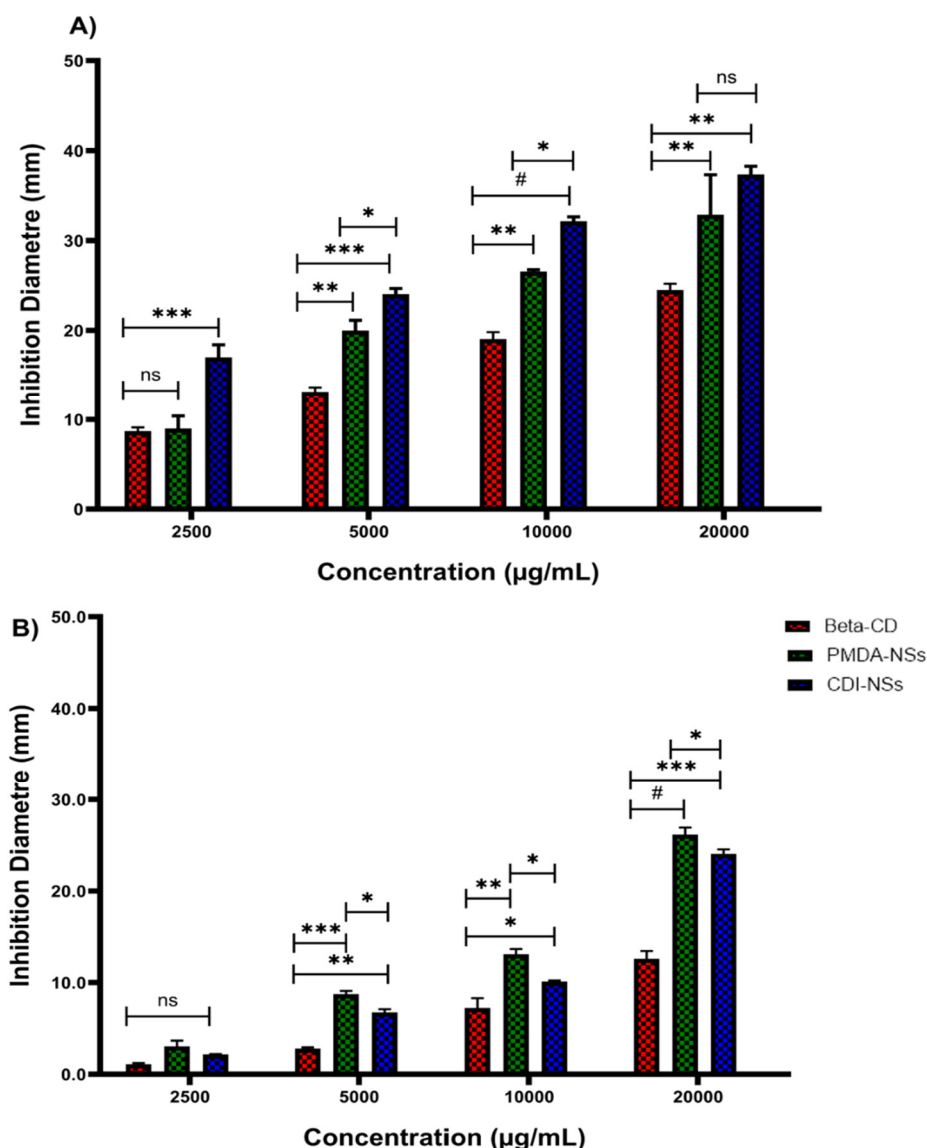

**Figure S1.** The inhibitory activity (appearance) of CDI-NSs, PMDA-NSs and  $\beta$ -CD free of drugs. It was evaluated by measuring the growth inhibition zones at different concentration against *E.coli* (A) and *S.aureus* (B) in well agar-diffusion assay. \* $P<0.05$ , \*\* $P<0.01$ , \*\*\* $P<0.001$ , # $P<0.0001$  and ns (Not Significant).

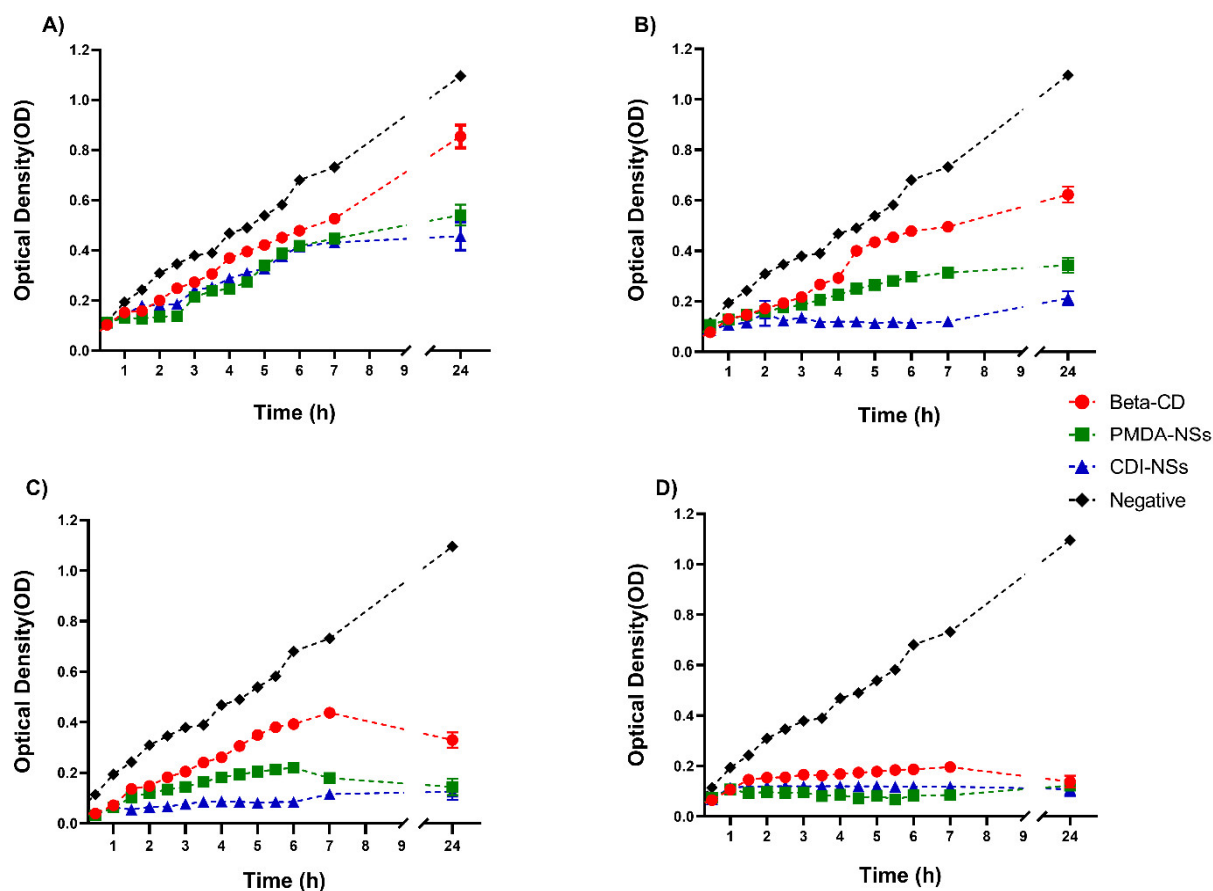

**Figure S2.** Growth curve of antibacterial activity of drug free formulations against *E. coli* compared to control measured by optical density (600 nm) as a function of time. A: 2500, B: 5000, C: 10000 and D: 20000  $\mu\text{g/mL}$ . All data are expressed as mean  $\pm$  standard deviation (n = 3).

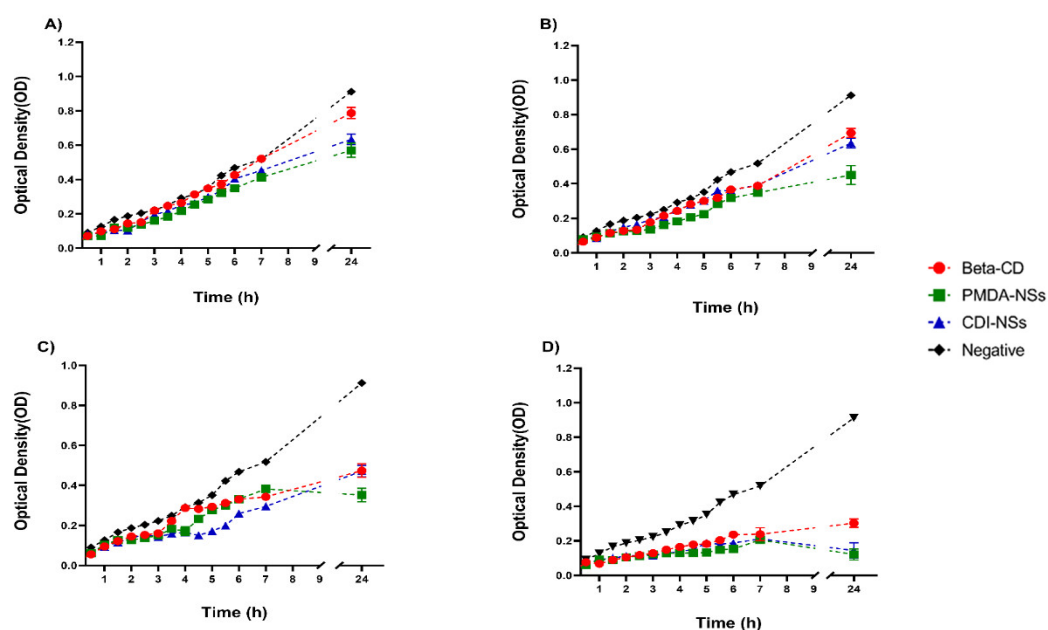

**Figure S3.** Growth curve of antibacterial activity of drug free formulations against *E. coli* compared to control measured by optical density (600 nm) as a function of time. A: 2500, B: 5000, C: 10000 and D: 20000  $\mu\text{g/mL}$ . All data are expressed as mean  $\pm$  standard deviation (n = 3).
